# Supplementary material for: A cell-based assay for CD63-containing extracellular vesicles
Source: PubMed Central journal article supplement (PMC6655660; doi:10.1371/journal.pone.0220007), 2019-07-24

**S5 Fig**

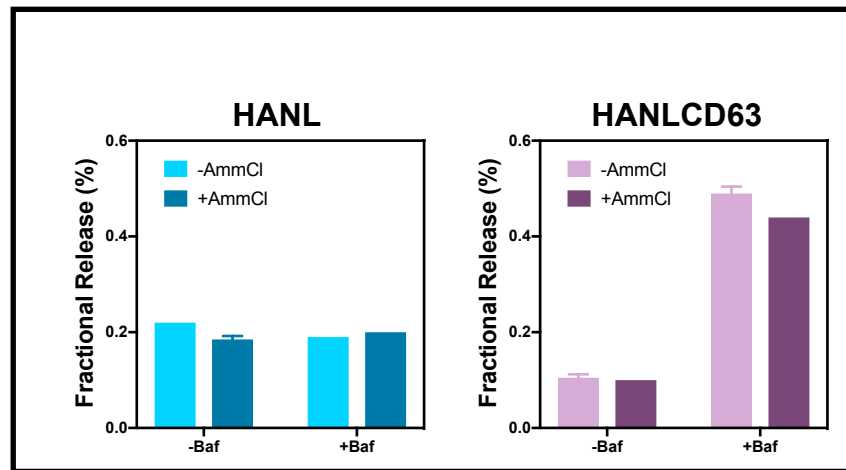

Supplement: pone.0220007.s006.pdf [file pone.0220007.s006.pdf]
